# Supplementary material for: Investigating the impact of coupling HARMONIE-WINS50 (cy43) meteorology to LOTOS-EUROS (v2.2.002) on a simulation of NO 2 concentrations over the Netherlands
Source: Copernicus journal article supplement (doi:10.5194/gmd-17-3765-2024), 2024-05-13
Supplement: Supplementary file 1 [file gmd-17-3765-2024-supplement.pdf]

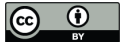

*Supplement of*

**Investigating the impact of coupling HARMONIE-WINS50 (cy43) meteorology to LOTOS-EUROS (v2.2.002) on a simulation of NO<sub>2</sub> concentrations over the Netherlands**

**Andrés Yarce Botero et al.**

*Correspondence to:* Andrés Yarce Botero (a.yarcebotero@tudelft.nl)

The copyright of individual parts of the supplement might differ from the article licence.



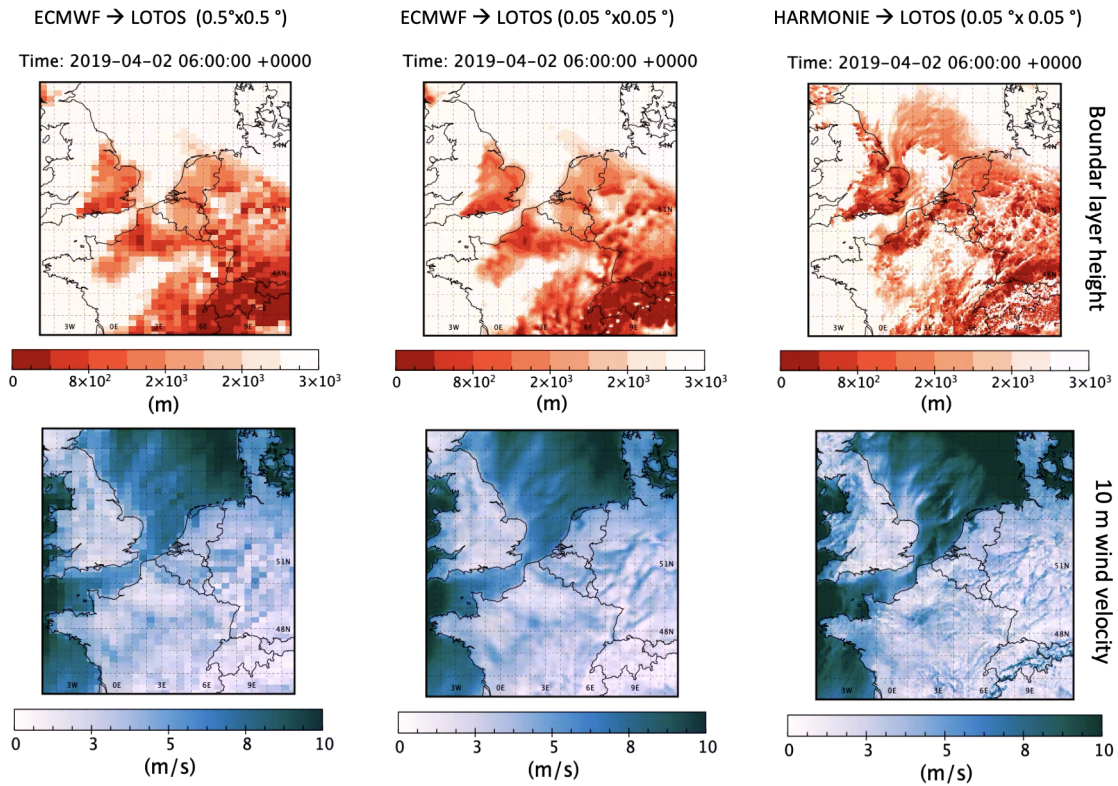

**Figure S2.** A comparison of the boundary layer and 10-meter wind velocity of ECMWF and HARMONIE interpolated to LOTOS-EUROS at different resolutions [0.5°, 0.05°] for April 2, 2019, at 6 UTC. The differences between ECMWF and HARMONIE indicate additional spatial structures using HARMONIE at the highest resolution, particularly in the North Sea region and mostly for boundary layer height

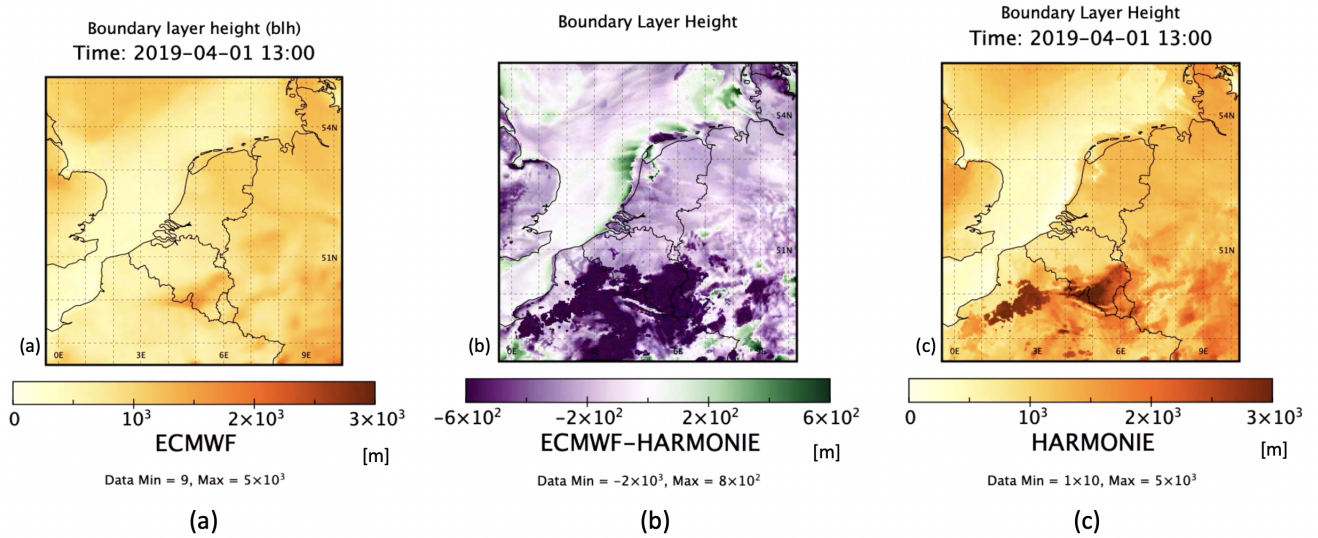

**Figure S3.** Boundary layer heights from ECMWF (a) and HARMONIE (c) as well as their difference (b) at the highest resolution of  $0.025^\circ \times 0.025^\circ$  indicating enhanced HARMONIE structural features for April 1, 2019 at 13 UTC

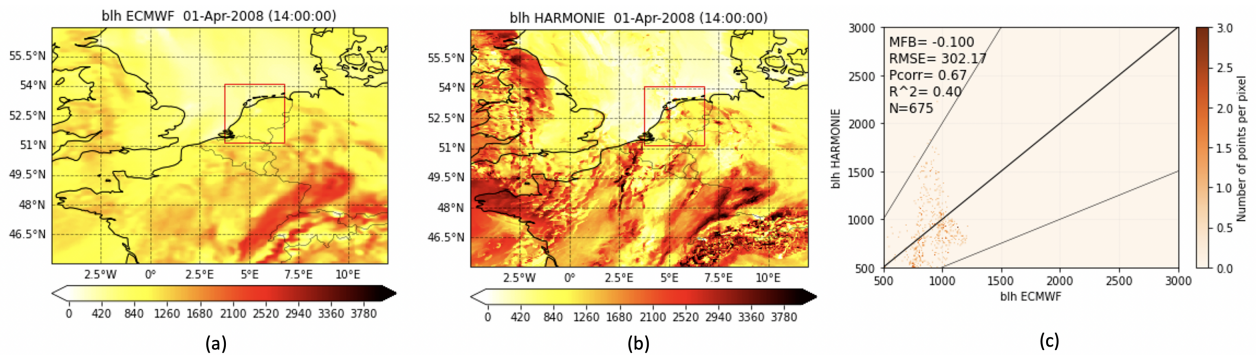

**Figure S4.** Boundary layer height of ECMWF (a) and HARMONIE (b) and their relationship quantified statistically (c) for the red square over the Netherlands. MFB = Mean Fractional Bias, RMSE = Root Mean Square Error, Pcorr = Pearson correlation coefficient as well  $R^2$  the regression coefficient and N the number of pixels



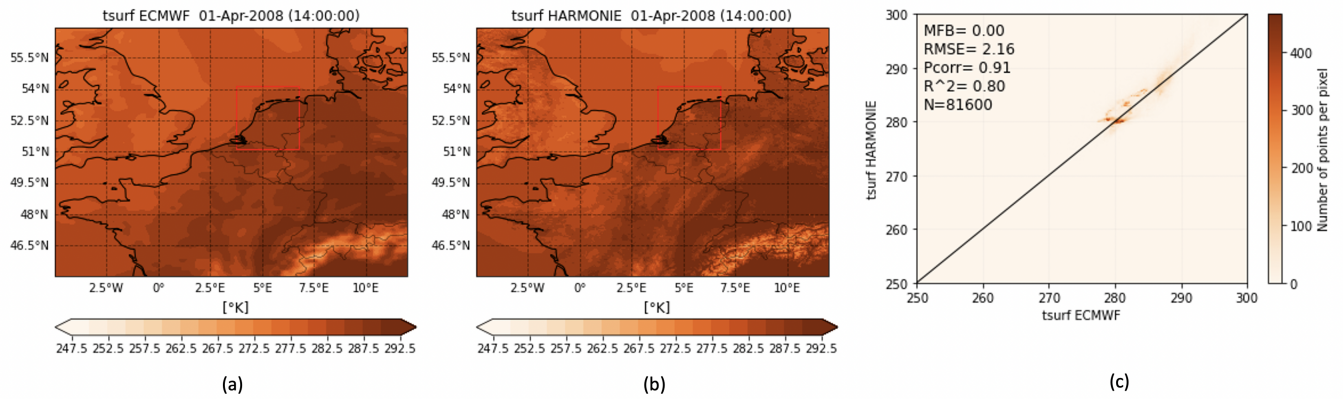

Figure S5. As Figure 4 for surface temperature

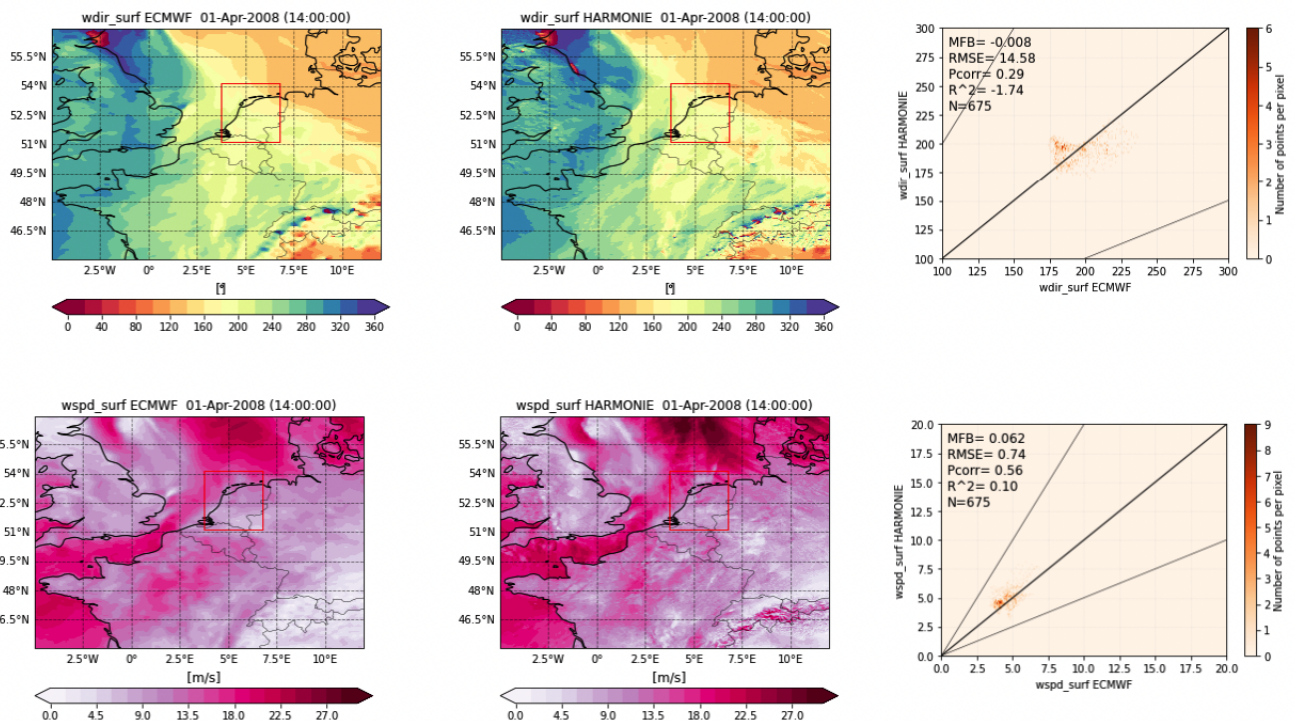

Figure S6. As Figure 4 for wind direction (top panels) and wind speed (bottom panels)

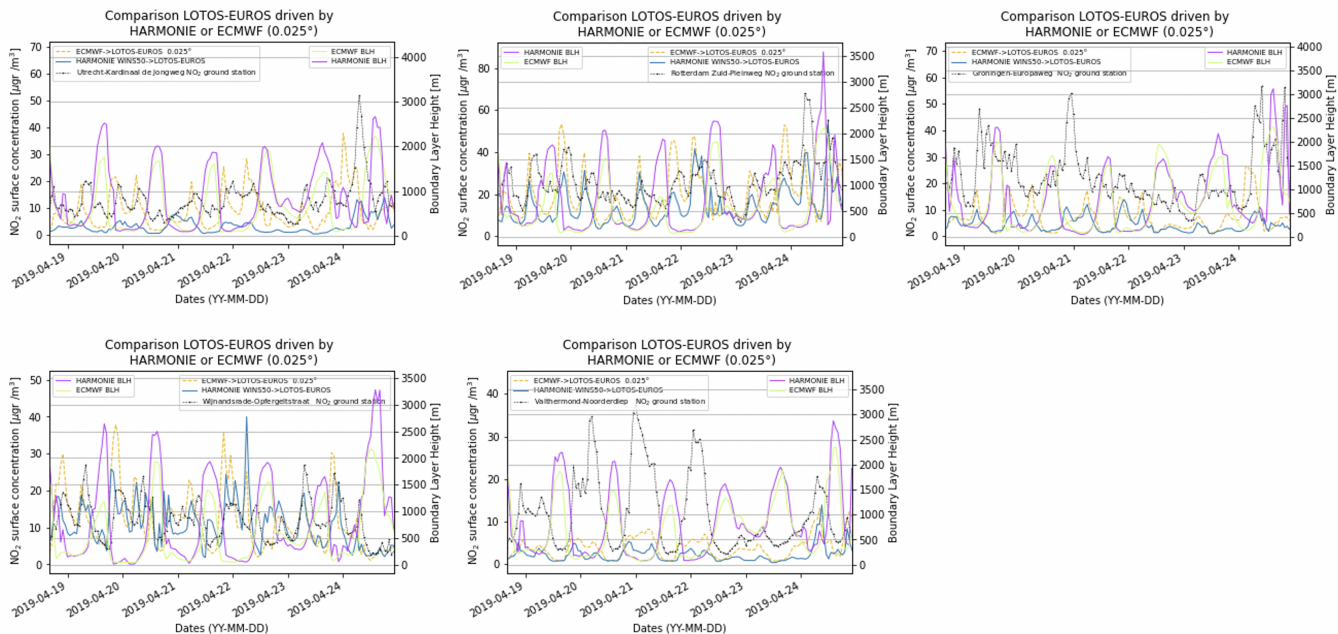

**Figure S7.** NO<sub>2</sub> concentrations of the two LOTOS-EUROS model configurations compared to the ground observations and to the boundary layer height for the time period April 19-25, 2019

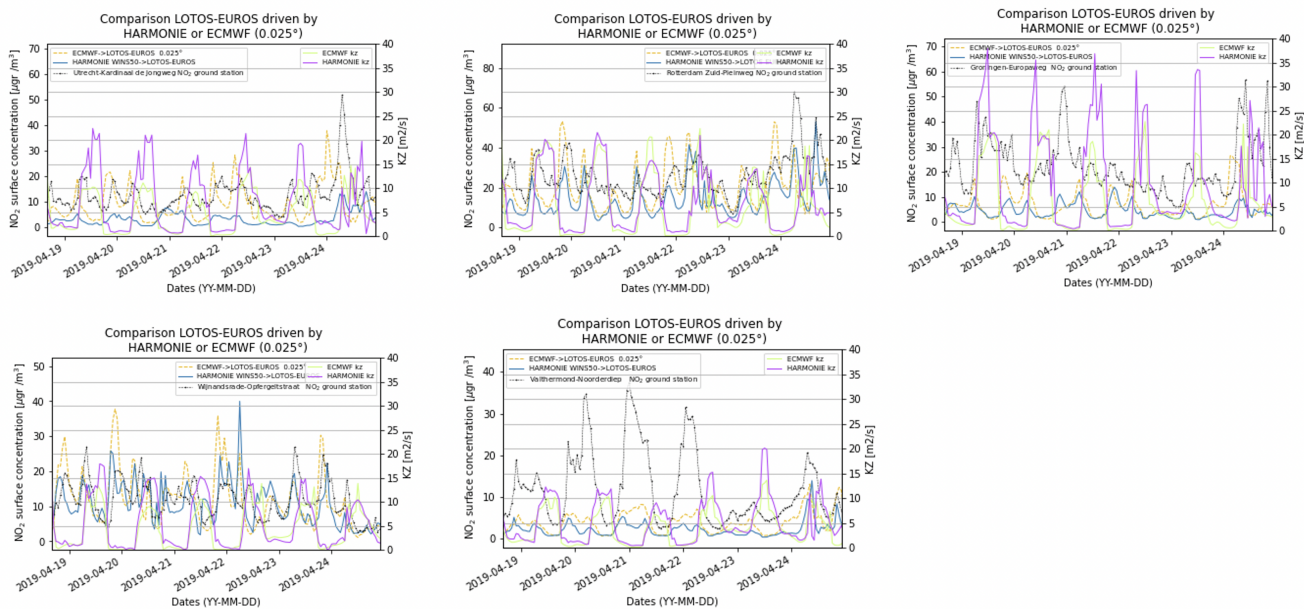

**Figure S8.** NO<sub>2</sub> concentrations of the two LOTOS-EUROS model configurations compared to the ground observations and to the Kz diffusion coefficient for the time period April 19-25, 2019
